# Supplementary material for: An alternative catalytic cycle for selective methane oxidation to methanol with Cu clusters in zeolites
Source: Royal Society of Chemistry journal article supplement (doi:10.1039/d3cp05802f), 2024-01-01
Supplement: d3cp05802f1.pdf [file d3cp05802f1.pdf]

## Supporting Information

An alternative catalytic cycle for selective methane oxidation to methanol with Cu clusters in zeolites

*Mario Gallego, Avelino Corma and Mercedes Boronat\**

Instituto de Tecnología Química (UPV-CSIC), Universitat Politècnica de València –  
Consejo Superior de Investigaciones Científicas, Avda. de los Naranjos s/n, 46022  
Valencia, Spain.

\*E-mail: boronat@itq.upv.es

**Table S1.** Calculated adsorption, activation and reaction energies in kJ/mol for the dissociation of molecular O<sub>2</sub> on different catalyst models. The optimized structures are depicted in Figures S1-S2.

|                                      | Structure | E <sub>ads</sub><br>(kJ/mol) | E <sub>act</sub><br>(kJ/mol) | E <sub>reac</sub><br>(kJ/mol) |
|--------------------------------------|-----------|------------------------------|------------------------------|-------------------------------|
| Cu <sub>5</sub> <sup>a</sup>         |           | -264                         | 93                           | -235                          |
| Cu <sub>5</sub> O <sub>2</sub>       | 1         | -69                          | -                            | -                             |
| Cu <sub>5</sub> O                    | 5         | -144                         | 13                           | -70                           |
| Cu <sub>5</sub> O <sub>3</sub>       | 24        | 33 / -24 <sup>b</sup>        | 157                          | 58                            |
| Cu <sub>5</sub> -OH-OCH <sub>3</sub> | 38        | -141                         | 16                           | -58                           |

<sup>a</sup>Data from reference *Phys. Chem. Chem. Phys.* 2022, 24, 30044.

<sup>a</sup>Quadruplet spin state.

**Table S2.** Relative energies (E<sub>rel</sub>) and Gibbs energies (G<sub>rel</sub>) in kJ/mol for all the structures involved in methane oxidation on Cu<sub>5</sub>O<sub>2</sub> clusters. Optimized structures depicted in Figure 1 and Figure S3.

| Structure               | E <sub>rel</sub> (kJ/mol) | G <sub>rel</sub> (kJ/mol) |
|-------------------------|---------------------------|---------------------------|
| 1 + CH <sub>4</sub>     | 0                         | 0                         |
| 2                       | -43                       | -33                       |
| TS(2→3)                 | 74                        | 69                        |
| 3                       | 67                        | 57                        |
| TS(3→4)                 | 106                       | 103                       |
| 4                       | -15                       | -6                        |
| 5 + CH <sub>3</sub> OH  | 74                        | 78                        |
| TS(2→6)                 | 59                        | 93                        |
| 6                       | -6                        | 9                         |
| TS(2→7)                 | 107                       | 114                       |
| 7                       | -47                       | -36                       |
| TS(7→8)                 | 136                       | 167                       |
| 8                       | 14                        | 34                        |
| 9 + CH <sub>3</sub> OH  | 132                       | 139                       |
| TS(2→10)                | 32                        | 63                        |
| 10                      | -24                       | -9                        |
| TS(10→11)               | 195                       | 204                       |
| 11                      | 45                        | 61                        |
| 24 + CH <sub>4</sub>    | 0                         | 0                         |
| 25                      | -23                       | -19                       |
| TS(25→26)               | 49                        | 37                        |
| 26                      | -26                       | -21                       |
| TS(26→27)               | 95                        | 101                       |
| 27                      | -41                       | -31                       |
| 28 + CH <sub>3</sub> OH | 72                        | 77                        |

**Table S3.** Relative energies ( $E_{\text{rel}}$ ) and Gibbs energies ( $G_{\text{rel}}$ ) in kJ/mol for all the structures involved in methane oxidation on  $\text{Cu}_5\text{O}$  clusters. Optimized structures depicted in Figure 2.

| Structure                   | $E_{\text{rel}}$ (kJ/mol) | $G_{\text{rel}}$ (kJ/mol) |
|-----------------------------|---------------------------|---------------------------|
| 5 + $\text{CH}_4$           | 0                         | 0                         |
| 12                          | -28                       | -31                       |
| TS(12→13)                   | 79                        | 82                        |
| 13                          | 67                        | 71                        |
| TS(13→14)                   | 121                       | 146                       |
| 14                          | -5                        | 20                        |
| 15 + $\text{CH}_3\text{OH}$ | 132                       | 144                       |
| 9 + $\text{CH}_4$           | 58                        | 61                        |
| 16                          | 7                         | 15                        |
| TS(16→17)                   | 128                       | 139                       |
| 17                          | 50                        | 63                        |
| TS(17→18)                   | 227                       | 252                       |
| 18                          | 91                        | 120                       |
| 19 + $\text{CH}_3\text{OH}$ | 169                       | 196                       |

**Table S4** Relative energies ( $E_{\text{rel}}$ ) and Gibbs energies ( $G_{\text{rel}}$ ) in kJ/mol for all the structures involved in methane oxidation on  $\text{Cu}_5\text{O}_3$  clusters, both in doublet (D) and quadruplet (Q) spin states. Optimized structures depicted in Figure 2.

| Structure                   | $E_{\text{rel}}$ (kJ/mol) |     | $G_{\text{rel}}$ (kJ/mol) |     |
|-----------------------------|---------------------------|-----|---------------------------|-----|
|                             | D                         | Q   | D                         | Q   |
| 20 + $\text{CH}_4$          | 0                         | 4   | 0                         | 10  |
| 21                          | -23                       | -24 | -8                        | -26 |
| TS(21→22)                   |                           | 48  |                           | 64  |
| 22                          | 37                        | 35  | 38                        | 29  |
| TS(22→23)                   | 85                        | 96  | 95                        | 123 |
| 23                          | -163                      | -7  | -110                      | 13  |
| 24 + $\text{CH}_3\text{OH}$ | -69                       | 78  | -45                       | 77  |

**Table S5.** Relative energies ( $E_{\text{rel}}$ ) and Gibbs energies ( $G_{\text{rel}}$ ) in kJ/mol for all the structures involved in competitive processes on  $\text{Cu}_5\text{O}_2$  clusters. Optimized structures depicted in Figure 4.

| Structure | $E_{\text{rel}}$ (kJ/mol) | $G_{\text{rel}}$ (kJ/mol) |
|-----------|---------------------------|---------------------------|
| 8         | 14                        | 34                        |
| TS(8→29)  | 183                       | 201                       |
| 29        | 77                        | 88                        |
| 6         | -6                        | 9                         |
| TS(6→30)  | 101                       | 113                       |
| 30        | -16                       | -4                        |
| TS(6→33)  | 192                       | 208                       |
| 33        | 57                        | 75                        |
| 7         | -47                       | -36                       |
| TS(7→31)  | 129                       | 140                       |
| 31        | -20                       | -9                        |
| TS(7→34)  | 83                        | 98                        |
| 34        | 27                        | 63                        |
| 10        | -24                       | -9                        |
| TS(10→32) | 120                       | 139                       |
| 32        | 87                        | 88                        |
| TS(10→34) | 94                        | 100                       |
| 34        | 27                        | 63                        |

**Table S6.** Relative energies ( $E_{\text{rel}}$ ) and Gibbs energies ( $G_{\text{rel}}$ ) in kJ/mol for all the structures involved in competitive processes on  $\text{Cu}_5\text{O}_3$  clusters and in pathway *I* for methane oxidation on  $\text{Cu}_5\text{-OH-OCH}_3$  catalytic system. Optimized structures depicted in Figure 5.

| Structure                   | $E_{\text{rel}}$ (kJ/mol) | $G_{\text{rel}}$ (kJ/mol) |
|-----------------------------|---------------------------|---------------------------|
| 35                          | -50                       | -33                       |
| TS(35→36)                   | 109                       | 126                       |
| 36                          | -30                       | -10                       |
| TS(35→37)                   | -4                        | 17                        |
| 37                          | -160                      | -136                      |
| TS(37→38)                   | -133                      | -111                      |
| 38                          | -154                      | -136                      |
| 39 + $\text{CH}_2=\text{O}$ | -120                      | -129                      |
| TS(38→40)                   | -43                       | -40                       |
| 40                          | -177                      | -156                      |
| 37 + $\text{CH}_4$          | -160                      | -136                      |
| 41                          | -192                      | -157                      |
| TS(41→42)                   | -104                      | -72                       |
| 42                          | -116                      | -83                       |
| TS(42→43)                   | -56                       | -16                       |
| 43                          | -155                      | -115                      |
| 44 + $\text{CH}_3\text{OH}$ | -78                       | -49                       |
| 45                          | -202                      | -145                      |
| TS(45→43)                   | -57                       | 3                         |

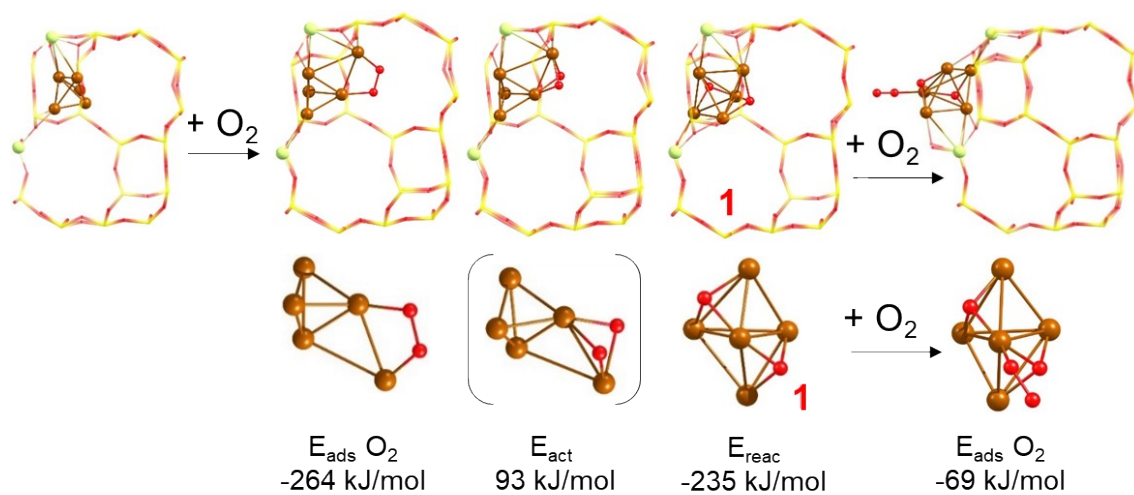

**Figure S1.** Optimized structures and calculated adsorption ( $E_{\text{ads}}$ ), activation ( $E_{\text{act}}$ ) and reaction ( $E_{\text{reac}}$ ) energies involved in the oxidation of  $\text{Cu}_5$  to  $\text{Cu}_5\text{O}_2$  (data from *Phys. Chem. Chem. Phys.* 2022, 24, 30044), and subsequent adsorption of an additional  $\text{O}_2$  molecule that remains mono-coordinated, in a non-activating adsorption mode that doesn't favor its dissociation. Si and O atoms in the framework depicted as yellow and red wires, Al, Cu and reactant O depicted as light green, brown and red balls, respectively.

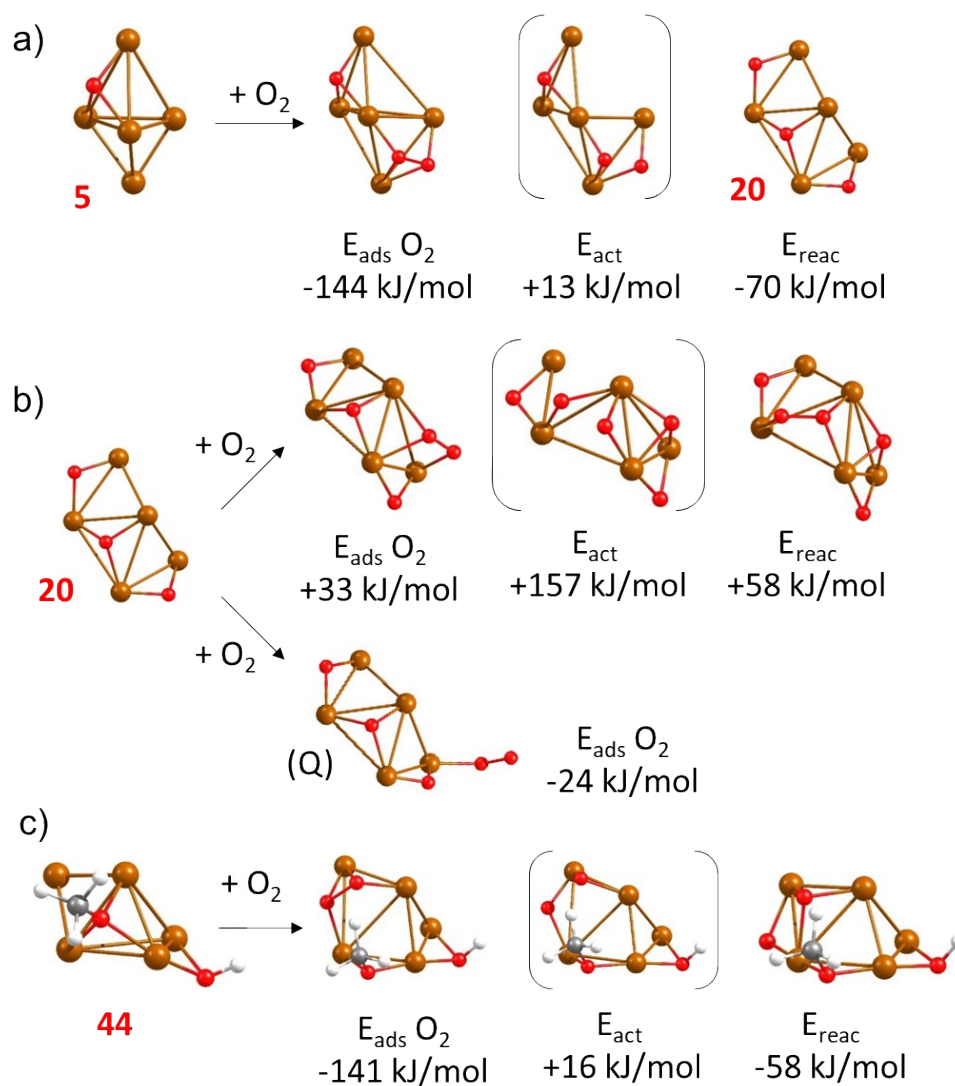

**Figure S2.** Optimized structures and calculated adsorption ( $E_{\text{ads}}$ ), activation ( $E_{\text{act}}$ ) and reaction ( $E_{\text{reac}}$ ) energies involved in the dissociation of molecular  $O_2$  on a)  $Cu_5O$ , b)  $Cu_5O_3$  and c)  $Cu_5OCH_3OH$  clusters. The spin state of all structures is doublet (D), with the only exception of the structure labeled (Q) which is a quadruplet. Cu, O, C and H atoms depicted as brown, red, gray and white balls. Transition states are in brackets.

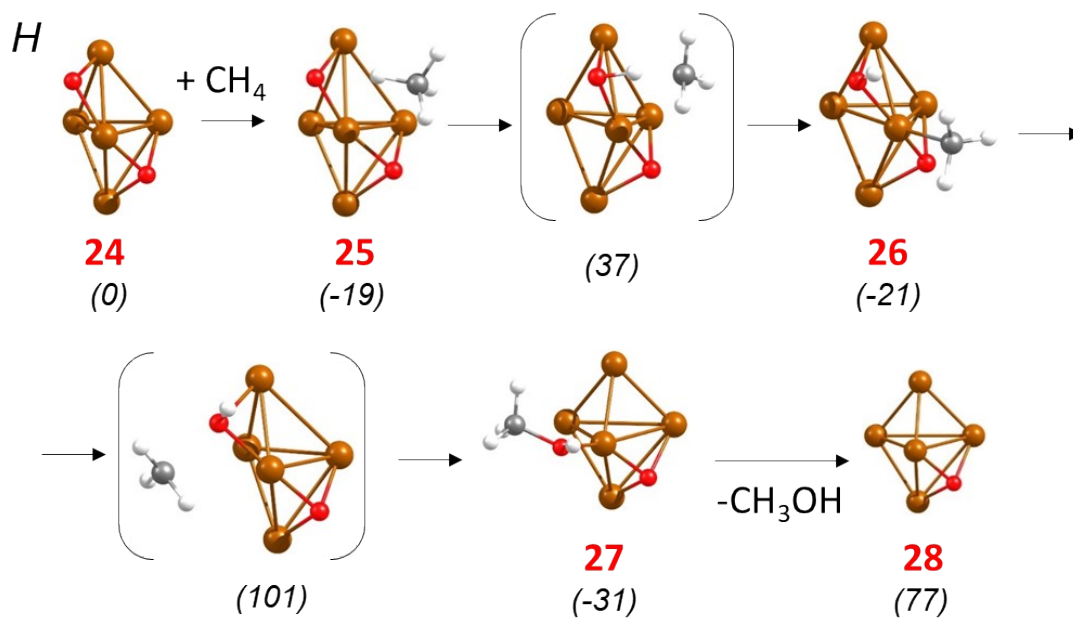

**Figure S3.** Optimized geometries of minima and transition state structures involved in the oxidation of methane to methanol following pathway *H* on a  $Cu_5O_2$  cluster supported on CHA zeolite. Cu, O, C and H depicted as brown, red, gray and white balls, respectively. Relative Gibbs energies at 478.15 given in brackets in kJ/mol.



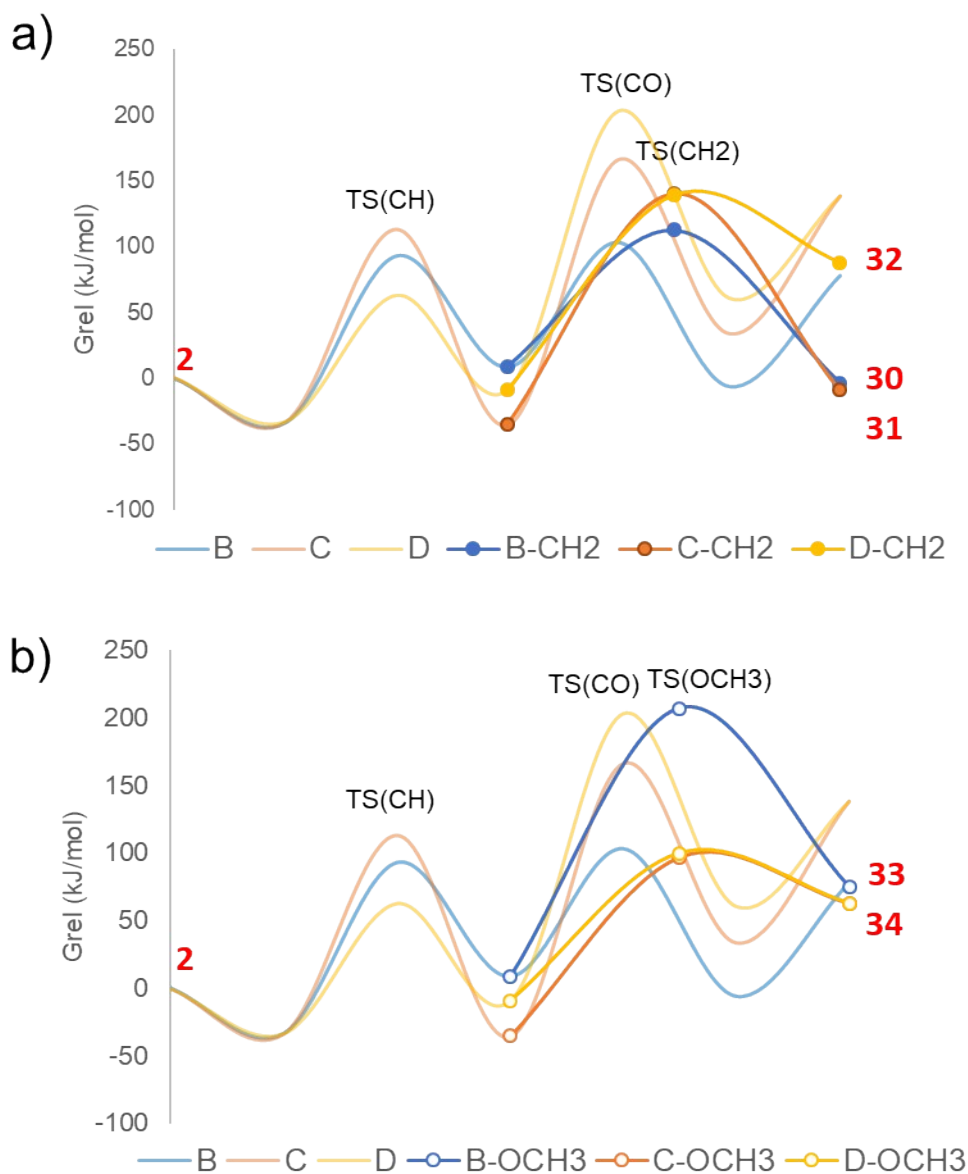

**Figure S4.** Calculated Gibbs energy profiles at 478.15 K for competing (a) C-H bond breaking in adsorbed methyl and (b) formation of methoxy on  $\text{Cu}_5\text{O}_2$  clusters supported on CHA zeolite. The transition states for methane C-H bond dissociation (TS(CH)), C-O bond formation (TS(CO)), C-H bond breaking in methyl (TS(CH<sub>2</sub>)) and formation of methoxy (TS(OCH<sub>3</sub>)) are indicated on the plots.
